# Supplementary material
Source: PubMed Central journal article supplement (PMC3699753)
Supplement: mmc2.pdf [file mmc2.pdf]

# Precision Sensing by Two Opposing Gradient Sensors: How Does *Escherichia coli* Find its Preferred pH Level?

Bo Hu and Yuhai Tu\*

IBM T.J. Watson Research Center, Yorktown Heights, New York

**ABSTRACT** It is essential for bacteria to find optimal conditions for their growth and survival. The optimal levels of certain environmental factors (such as pH and temperature) often correspond to some intermediate points of the respective gradients. This requires the ability of bacteria to navigate from both directions toward the optimum location and is distinct from the conventional unidirectional chemotactic strategy. Remarkably, *Escherichia coli* cells can perform such a precision sensing task in pH taxis by using the same chemotaxis machinery, but with opposite pH responses from two different chemoreceptors (Tar and Tsr). To understand bacterial pH sensing, we developed an Ising-type model for a mixed cluster of opposing receptors based on the push-pull mechanism. Our model can quantitatively explain experimental observations in pH taxis for various mutants and wild-type cells. We show how the preferred pH level depends on the relative abundance of the competing sensors and how the sensory activity regulates the behavioral response. Our model allows us to make quantitative predictions on signal integration of pH and chemoattractant stimuli. Our study reveals two general conditions and a robust push-pull scheme for precision sensing, which should be applicable in other adaptive sensory systems with opposing gradient sensors.

## INTRODUCTION

The survival of living systems relies on their ability to sense their environmental conditions and move to advantageous locations. A classic example is bacterial chemotaxis (1–4): By sensing gradients of chemical stimuli, bacterial cells usually migrate in a unidirectional mode following the gradients, i.e., from low to high attractant concentrations or from high to low repellent concentrations. This strategy allows them to find nutrients (attractant) and escape from toxins (repellent). However, there are other environmental factors such as pH and temperature, for which the physiological optimum may not be the extremes in a gradient but correspond to an intermediate level. For example, extremely acidic or alkaline environments can be detrimental to *Escherichia coli* cells (5). Interestingly, the same chemotaxis machinery is also used in the bacterial pH taxis and the opposing pH responses by two major types of chemoreceptors to determine the preferred pH level (6–9). Therefore, a push-pull mechanism may be responsible for the pH taxis, which allows cells to invert their responses at a particular pH value. This mode of precision sensing is closely related to, yet quite different from, the traditional concept of chemotaxis, which generates unidirectional response to certain chemical gradients. Instead of directing cells to the extreme levels in a gradient, precision sensing helps cells to find some intermediate, optimal level of stimuli. So far, however, the mechanisms for precision sensing remain poorly understood.

In *E. coli*, extracellular chemical stimuli are sensed and processed by several types of transmembrane chemorecep-

tors, among which the aspartate binding receptor (Tar) and serine binding receptor (Tsr) are the most abundant (10). Interaction among different types of receptors enables them to act together and respond cooperatively to specific signals (11–13). Over the past decades, there has been significant progress, both experimental and theoretical, in understanding the role of receptor cooperativity in signal amplification (11–23). In *E. coli*, Tar and Tsr form heterotrimers of homo-dimers in cytoplasmic membrane (24–26). These receptors form clusters that associate with the adaptor protein CheW and the histidine kinase CheA (27–29). Binding of attractant (or repellents) to the periplasmic domain of receptors inhibits (or promotes) the autophosphorylation activity of CheA, which in turn decreases (or increases) phosphorylation of the response regulator CheY and eventually regulates the flagellar motor to navigate the cell toward attractant (or away from repellent). The system also contains a phosphatase CheZ, which dephosphorylates CheY-P (the phosphorylated form of CheY).

Sensory adaptation is needed to maintain a short-term memory for temporal comparisons of concentrations when swimming in a gradient (4,30,31). In *E. coli*, adaptation is achieved by receptor methylation and demethylation, as catalyzed by two cytoplasmic enzymes, methyltransferase CheR and methylesterase CheB, which add and remove methyl group at specific sites of receptors, respectively. Methylation of receptors increases the kinase activity of CheA that phosphorylates both CheY and CheB. Phosphorylation of CheB enhances its enzymatic activity (for demethylation) and helps restore the receptor-kinase activity to its prestimulus level (adaptation) after its initial response to an external stimulus. However, if it is only the total kinase activity that controls the adaptation (methylation/demethylation) process, there will be severe methylation crosstalk

Submitted March 11, 2013, and accepted for publication April 29, 2013.

\*Correspondence: yuhai@us.ibm.com

Editor: Dennis Bray.

© 2013 by the Biophysical Society  
0006-3495/13/07/0276/10 \$2.00

<http://dx.doi.org/10.1016/j.bpj.2013.04.054>

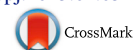

(memory contamination) between different types of receptors; for example, both Tar (specific for aspartate) and Tsr (specific for serine) receptors will be methylated to the same degree even when the cell only experiences a change in aspartate concentration. A recent study shows that bacterial cells avoid methylation crosstalk by having the activity of individual receptors locally control their own methylation dynamics (13). This local adaptation mechanism drives each individual receptor to its most responsive state and maintains high sensitivity of the entire receptor cluster (13).

Although the molecular sensing mechanism is unclear, bacterial pH taxis is also mediated by the two major receptors, Tar and Tsr. A recent study showed that Tar gives an attractant response whereas Tsr elicits a repellent response to an increase in pH (9). The competition between these opposing effects results in a particular preferred pH value. Here, we develop a mathematical model to explain the recent experimental data on bacterial pH sensing. We attempt to address the following questions:

1. How could the gradient sensing chemotaxis signaling pathway be used to carry out precision sensing in pH taxis?
2. What determines (encodes) the preferred pH value?
3. How is the pH sensing program integrated with other chemical sensing processes?
4. What are the general conditions or constraints for the push-pull mechanism to perform precision sensing?

## THE ISING-TYPE MODEL FOR PH SENSING

Our model for pH sensing is based on the Ising-type model for a mixed cluster of receptors (Tar and Tsr) as proposed in Lan et al. (13) and Mello and Tu (18). We assume that the environmental pH modulates the receptor-kinase activity primarily by affecting the periplasmic domain of the receptors just like chemoattractants bind to receptors in chemosensing. This assumption is supported by the experiment on a hybrid Tsr receptor, which has the periplasmic domain of Tsr and the signaling domain of Tar but resembles the response of Tsr (9). In light of such analogy, each single receptor can be characterized by four state variables  $(q, l, s, m)$  that are labeled as subscripts:  $q$  defines the type of receptor with  $q = 1$  for Tar and  $q = 2$  for Tsr;  $l = 0, 1$  indicates the proton binding state of the receptor;  $s = 0, 1$  represents the inactive or active conformation of the receptor; and  $m \in [0, 4]$  records the receptor's methylation level because Tar and Tsr have up to four or five methyl groups. The process of receptor covalent modification is much slower than that of the ligand binding and activity switching (32). Such separation of timescales allows us to treat the evolution of  $(l, s, m)$  with a quasi-equilibrium approximation. The receptor binding/activity states can be described by their equilibrium values for a given  $m$ , whereas the slow methylation dynamics is characterized by a system of

coupled ordinary differential equations tracing the population distribution of receptors at different methylation levels.

The free energy of an individual receptor in the state  $(q, l, s, m)$  is given by

$$H_{q,l,s,m} = \mu_q \cdot l + \left( E_q^l \cdot l + E_{q,m}^M + E_q^C \right) \cdot s, \quad (1)$$

where the chemical potentials of the inactive and active proton-bound receptors,  $\mu_q$  and  $\mu_q + E_q^L$ , are defined as

$$e^{-\mu_q} = 10^{K_q^I - \text{pH}} \quad \text{and} \quad e^{-(\mu_q + E_q^L)} = 10^{K_q^A - \text{pH}}. \quad (2)$$

Note that the proton concentration at a given pH is equal to  $10^{6-\text{pH}}$   $\mu\text{M}$ . For convenience, we have expressed the effective dissociation constants  $K_q^I$  and  $K_q^A$  for the inactive and active type- $q$  receptors in the pH scale. In principle,  $K_q^I$  and  $K_q^A$  may depend on the receptor methylation level  $K_q^{I,A} = K_q^{I,A}(m)$ , as evidenced by pH sensing experiments for cells with different receptor methylation levels (9). However, we found that the push-pull mechanism for pH taxis works as long as Tar and Tsr dominate different pH regimes, regardless of such methylation level dependence; see the [Supporting Material](#) for details. For this reason, we will assume constant  $K_q^I$  and  $K_q^A$  in the rest of the article and examine the consequence of the methylation level dependence in the Discussion section.

In Eq. 1,  $E_{q,m}^M$  represents the free energy contribution by receptor methylation and is assumed to be a linear function of  $m$  for intermediate methylation levels (32),

$$E_{q,m}^M = \alpha_q \cdot (m - m_{q,0}), \quad \text{for } 0 < m < 4, \quad (3)$$

where  $\alpha_q$  measures the free energy change by adding one methyl group, and  $m_{q,0}$  sets the average methylation level in zero ligand background. Note that the methylation energy at the boundary,  $|E_{q,m=0}^M|$  and  $|E_{q,m=4}^M|$ , should be large enough to ensure accurate adaptation; see the [Supplementary Information](#) of Lan et al. (13) for details. In the Ising model, neighboring receptors in the mixed cluster can interact with each other, as captured by the receptor-receptor coupling energy term  $E_q^C$  in Eq. 1, which is assumed to depend linearly on the activity of its neighbors:

$$E_q^C = \sum_{(nn)} \frac{C_{qq'}}{N_0} \cdot \left( s_{q'} - \frac{1}{2} \right). \quad (4)$$

The above expression means that the activity of a receptor ( $s = 0$  or  $1$ ) in the cluster depends on the activities of its  $N_0$  neighbors with a coupling strength  $C_{qq'}/N_0 < 0$  for each cooperative interaction. To preserve symmetry between active and inactive states, we have put  $1/2$  in Eq. 4. This treatment does not alter our main results or conclusions.

All the aforementioned energies are written in the units of the thermal energy  $k_B T$ . In the mean-field approximation,

the average activity of a type- $q$  receptor at methylation level  $m$  can be written as

$$\langle a \rangle_{q,m} = \left\{ 1 + \frac{1 + 10^{K_q^I - \text{pH}}}{1 + 10^{K_q^A - \text{pH}}} \cdot \exp \left[ E_{q,m}^M + \sum_{q'=1,2} f_{q'} C_{qq'} \right. \right. \\ \left. \left. \times \left( \langle a \rangle_{q'} - \frac{1}{2} \right) \right] \right\}^{-1} \quad (5)$$

where  $f_q$  is the fraction of type- $q$  receptor such that  $f_1 + f_2 = 1$  and  $\langle a \rangle_q$  represents the mean-field activity averaged over all type- $q$  receptors, i.e.,

$$\langle a \rangle_q = \sum_{m=0}^4 P_{q,m} \langle a \rangle_{q,m}. \quad (6)$$

The symbol  $P_{q,m}$  in Eq. 6 represents the fractional population of type- $q$  receptors with methylation level  $m$ , and satisfies the normalization condition  $\sum_{m=0}^4 P_{q,m} = 1$ . Subject to the (slow) methylation-demethylation kinetics,  $P_{q,m}$  values are governed by the following master equations,

$$\frac{dP_{q,m}}{dt} = k_R \left( 1 - \langle a \rangle_{q,m-1} \right) P_{q,m-1} + k_B \langle a \rangle_{q,m+1} P_{q,m+1} \\ - \left[ k_R \left( 1 - \langle a \rangle_{q,m} \right) + k_B \langle a \rangle_{q,m} \right] P_{q,m}, \quad (7)$$

with the boundary condition  $P_{q,m < 0} = P_{q,m > 4} = 0$ . Here, we assume that only inactive receptors methylate with rate  $k_R$ , and only active receptors demethylate with rate  $k_B$ . The timescale is set by  $k_R = 1$ . We take constant rates of  $k_R$  and  $k_B$  by using a linear approximation (32). In general, both  $k_R$  and  $k_B$  depend on the kinase activity. Such dependence, however, does not change the behavior of our model significantly because accurate adaption maintains the receptor activity near its preferred level, where the linear approximation holds.

Equations 5–7 fully define our pH sensing model. The only parameters specific to pH sensing are  $K_q^{IA}$ ; all the other parameters are the same as in chemotaxis (Table 1). Equation 7 is solved numerically using the Euler discretization method. At each time step, we first solve Eqs. 5 and 6 under the current pH level using the nonlinear equation

solver Fsolve in MATLAB (The MathWorks, Natick, MA), and then we plug the new solution of  $\{\langle a \rangle_{q,m}\}$  and  $\{\langle a \rangle_q\}$  into Eq. 7 and update  $\{P_{q,m}\}$  over this small time interval using the solver Ode15s in MATLAB. Iterating the above procedure will give us the entire dynamics of receptor activity and methylation distribution.

## RESULTS

### Tar and Tsr respond oppositely to pH changes

In a recent experiment (9), Yang and Sourjik used the fluorescence resonance energy transfer (FRET) technique to investigate the intracellular response of *E. coli* chemotaxis pathways to step-like changes of extracellular pH. The energy transfer pair is CheY and CheZ such that the FRET signal is proportional to [CheY-P-CheZ], the concentration of the intermediate species in the enzymatic hydrolysis of CheY-P (11). At steady state, the production rate of CheY-P, catalyzed by CheA, is exactly balanced by its degradation rate, which is proportional to [CheY-P-CheZ]. Therefore, the FRET signal can be viewed as a reporter of the CheA kinase activity. The authors found that mutant cells expressing only Tar, when preadapted at neutral pH of 7.0, exhibit an attractant response to a decrease of pH and a repellent response to an increase of pH. An opposite response was observed for cells expressing only Tsr.

In our Ising-type model, we can set  $f_1 = 1, f_2 = 0$  (or  $f_2 = 1, f_1 = 0$ ) to model mutant cells expressing only Tar (or Tsr). The opposite responses to pH changes for Tar and Tsr can be described in our model by setting  $K_1^A < K_1^I$  for Tar and  $K_2^A < K_2^I$  for Tsr. In Fig. 1 A, we plot the receptor activity  $\langle a \rangle_1$  for cells expressing Tar ( $f_1 = 1$ ) in response to certain changes of pH stimuli. Indeed, a decrease (or an increase) of pH is like an attractant (or a repellent) to the Tar receptors in our model. The opposite response of Tsr receptors, denoted by  $\langle a \rangle_2$ , to the same pH profile is also plotted in Fig. 1 A, consistent with experimental observations (9).

We also studied the receptor activity of Tar and Tsr in response to steps of increasing pH values (Fig. 1 B). Before each step of stimulation, the model system is allowed to adapt to the ambient pH. The simulation was carried out over a broad range of ambient pH values (from pH 6.8 to 8.9 with step size  $\Delta\text{pH} = 0.3$ ). As one can see from Fig. 1 B, the Tar response remains relatively strong whereas the Tsr response decreases as the pH level increases in the tested pH range. This pattern results from the different operating regions of Tar and Tsr as determined by their respective dissociation parameters in our model (Table 1), and is qualitatively consistent with the experimental observations (9). Moreover, Tar dominates the response at high pH values and Tsr dominates at low pH regions. Such difference in dominance is critical for the system to invert its response at an intermediate pH value.

**TABLE 1** Parameters used in the Ising-type model

| Parameter   | Value  | Parameter   | Value |
|-------------|--------|-------------|-------|
| $f_1$       | 1/2    | $f_2$       | 1/2   |
| $m_{1,0}$   | 1.0    | $m_{2,0}$   | 2.5   |
| $E_{1,0}^M$ | 10     | $E_{2,0}^M$ | 10    |
| $\alpha_1$  | -1.875 | $\alpha_2$  | -1.5  |
| $C_{11}$    | -3.5   | $C_{12}$    | -3.5  |
| $C_{21}$    | -4.0   | $C_{22}$    | -4.0  |
| $k_R$       | 1      | $k_B$       | 2     |
| $K_1^I$     | 9.0    | $K_2^I$     | 6.0   |
| $K_1^A$     | 7.3    | $K_2^A$     | 7.8   |

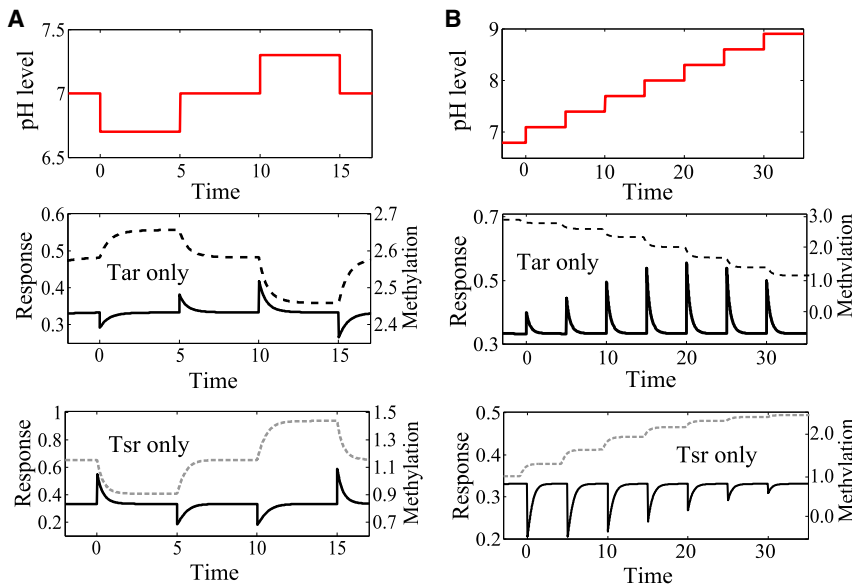

FIGURE 1 Responses to pH stimulation (solid lines) and dynamics of methylation levels (dashed lines) for the Tar-only mutant ( $f_1 = 1$ ) and the Tsr-only mutant ( $f_2 = 1$ ). (A) Tar and Tsr responses to up and down pH steps. (B) Tar and Tsr responses to a series of increased steps, from pH = 6.8 to pH = 8.9 with step size  $\Delta\text{pH} = 0.3$ .

Similar to chemotaxis, adaptation to pH changes is achieved by changes in receptor methylation. Specifically, the methylation level increases upon positive (attractant) stimulation and decreases upon negative (repellent) stimulation. As shown in Fig. 1 (dashed lines), Tar (or Tsr) methylation decreases (or increases) at higher pH, in agreement with experiments (9). The observation reported in Yang and Sourjik (9) of distinctive methylation patterns for Tar and Tsr also confirms the local adaptation mechanism (13) that the adaptation processes for individual receptors are affected by their own activities (conformational changes), instead of being solely regulated by the total kinase activity of the receptor cluster.

### The reversal of pH response in wild-type cells

The response of wild-type (WT) *E. coli* cells that express both Tar and Tsr is determined by integration of the two opposing pH responses. Fig. 2 plots the responses for the Tar-only mutant, the Tsr-only mutant, and the WT cell to a series of pH steps with varying step sizes ( $\Delta\text{pH}$ ) but the same ambient pH. We denote  $\text{pH}_0$  and  $\text{pH}_1 (= \text{pH}_0 + \Delta\text{pH})$  as the pre- and poststimulation pH levels, respectively. As shown in Fig. 2 B, the WT cell (with the Tar/Tsr ratio  $f_1/f_2 = 0.5$ ) exhibits a repellent response to a decrease in pH and an attractant response to an increase in pH, similar to the Tsr-only response. This suggests that the WT response at ambient pH 7.0 is dominated by the Tsr-mediated response, consistent with the experimental findings (9). Fig. 2 C plots their initial responses (i.e., the maximum magnitude right after each stimulation) as a function of  $\text{pH}_1$  with ambient  $\text{pH}_0 = 7.0$ . The quantitative values of  $K_{1,2}^{A,I}$ , as listed in Table 1, are determined by fitting our model to the experimental data for the Tar-only and Tsr-only mu-

tants. These values are then used in the model, now without any free parameters, to predict the pH response for the WT cell. As shown in Fig. 2 C, the modeling results are in good agreement with the experimental observations.

The response also depends on the ambient pH level, denoted by  $\text{pH}_0$ . Fig. 3, A and B, plots the response of the WT strain (with  $f_1/f_2 = 0.5$ ) to steps of first increasing then decreasing pH with the same step size ( $\Delta\text{pH} = 0.3$ ). The model exhibits an attractant response of gradually decreasing magnitude for ambient pH level up to  $\text{pH}_0 = 7.7$ . The response then inverts to a repellent response for  $\text{pH}_0 \geq 8.0$ . For the sequence of steps of decreasing pH, the WT system shows an almost mirror-image response of opposite sign (Fig. 3 B). This response pattern again resembles the experimental observation (9). Quantitatively, the inversion point  $\text{pH}^*$  (the preferred pH) lies between 8.0 and 8.3, also agreeing with the experimental finding (9).

### The preferred pH depends logarithmically on the receptor abundance ratio

What determines the inversion point  $\text{pH}^*$  in the pH response of *E. coli* cells?

Experimentally, it has been found that the relative levels of Tar and Tsr change with the cell density and growth conditions in the medium (33). By tuning the cell density and growth condition, Yang and Sourjik (9) observed a shift of the inversion point,  $\text{pH}^*$ , from 8.0 to 7.5, as a result of the increased abundance of Tar relative to Tsr (the Tar/Tsr ratio from 0.5 to 1.5). Taking the same parameters we used in Fig. 2, our model also predicts the response pattern with shifted  $\text{pH}^*$ , similar to what was observed in experiment (Fig. 3 C). The solid (or dashed) lines represent the magnitude of response to steps of increasing and decreasing pH

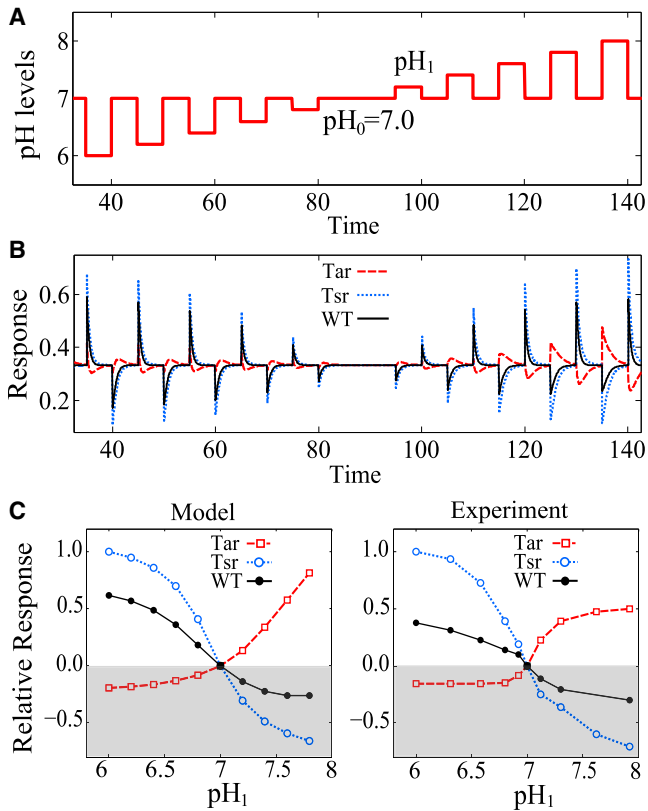

FIGURE 2 (A and B) Responses of the Tar-only mutant ( $f_1 = 1$ , dashed line), the Tsr-only mutant ( $f_2 = 1$ , dot-dashed line), and the WT strain ( $f_1 = f_2 = 0.5$ , solid line) to a series of pH steps with varying step sizes and but same ambient pH level ( $pH_0 = 7.0$ ). (C) Their relative responses (normalized by the maximum response value among all the data points in each subfigure) versus the poststimulation pH, denoted as  $pH_1 = pH_0 + \Delta pH$ . (Left panel) Obtained from our model results in panel B and is compared with the experimental measurements (right panel) in Yang and Sourjik (9).

given that the Tar/Tsr ratio is 0.5 (or 1.5), as can be obtained from simulations shown in Fig. 3 B.

Analytically, we have simplified our full model (see the Supporting Material for detailed derivation) to provide a quantitative prediction on how this inversion point of pH depends on the relative levels of Tar and Tsr. Specifically, we found that the inversion point could be modulated as a (minus) logarithm of the Tar/Tsr ratio (to base 10):

$$pH^* \approx K_2^A - \log_{10} \left( \frac{f_1}{f_2} \right). \quad (8)$$

Given a change of Tar/Tsr ratio from 0.5 to 1.5, we can estimate that the shift of inversion pH point is roughly:  $\log_{10}(1.5) - \log_{10}(0.5) \approx 0.48$ , which is quite close to the experimental observation  $8.0 - 7.5 = 0.5$ . This tunability of the preferred pH point can be beneficial for cells to adjust their behavioral responses according to both internal and external physiological conditions. Additional measurements for cells with different receptor population ratios ( $f_1/f_2$ ) can be used to test our model prediction quantitatively.

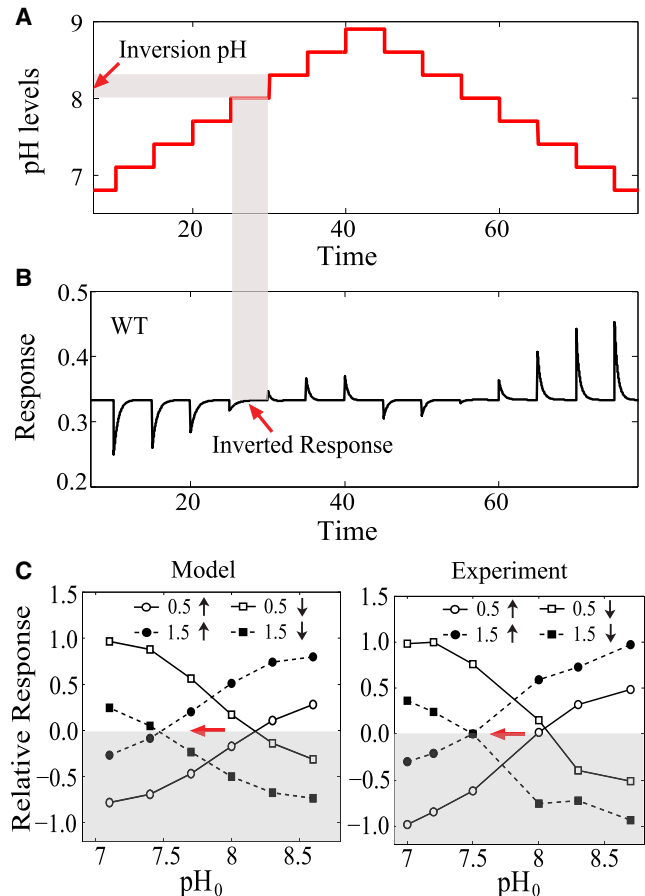

FIGURE 3 (A and B) Response of the WT cell with  $f_1/f_2 = 0.5$  to steps of first increasing then decreasing pH levels (the ambient  $pH_0$ :  $6.8 \rightarrow 8.9 \rightarrow 6.8$  with step size  $\Delta pH = 0.3$ ). As illustrated by the shaded area, the inversion pH can be located by mapping the region where the response becomes inverted. (C) Relative responses versus the ambient  $pH_0$  for increasing pH steps (circles, up arrow) and decreasing pH steps (squares, down arrow) under two different Tar/Tsr ratios:  $f_1/f_2 = 0.5$  (open symbols, solid lines) and  $f_1/f_2 = 1.5$  (solid symbols, dashed line). (Horizontal arrow) Shift of the response inversion point to lower pH upon increasing the Tar/Tsr ratio. (Left panel) Our model results; these are directly compared to the experimental measurements (right panel) in Yang and Sourjik (9). The relative responses were normalized by the maximum response value among all the data points in each subfigure (either model or experiment).

Our model has so far focused on the signaling pathway for pH sensing. How does the sensory output (receptor-kinase activity) navigate the cells' migration toward the preferred pH level?

To answer this question, we have implemented a two-dimensional Monte-Carlo simulation for cells moving in a linear pH gradient (pH from 6.0 to 9.0 in  $600 \mu m$ ). The algorithm is based on an earlier computational model for bacterial chemotaxis (34). Here, we have directly incorporated the pH sensing module (Tar and Tsr) into the original algorithm, using the same parameters given in Table 1. Effects of the pH change on the motor speed have been measured before in Chen and Berg (35) where only weak dependence of the speed on the external pH was observed.

Thus, we assumed a constant run speed in the simulations. As shown in Fig. 4, cells (which were uniformly distributed at the beginning) eventually accumulate near a location corresponding to the preferred pH value. Furthermore, as the Tar/Tsr ratio changes from 0.5 to 1.5, the average pH, as sampled by the locations of 100 cells, is found to change from 8.15 to 7.4. Our simulation results demonstrate the capability of the precision sensing mechanism in guiding the cells to their preferred pH level, which can be tuned by changing the relative abundance of the two opposing sensors.

## Two general conditions for precision sensing

What are the general constraints for the precision sensing mechanism via two opposing gradient sensors?

Here, we use our model to answer this question, taking pH sensing as an example. For cells that are adapted to a background pH level (denoted by the variable pH), their average kinase activity changes to  $a(\text{pH}, \text{pH}')$  directly after the pH level changes to a new level  $\text{pH}'$  (before adaptation sets in). The response at the background to an infinitesimal increase of pH is characterized by the sensitivity  $S$  defined as

$$S(\text{pH}) \equiv \lim_{\delta \text{pH} \rightarrow 0} \frac{a(\text{pH}, \text{pH} + \delta \text{pH}) - a(\text{pH}, \text{pH})}{\delta \text{pH}}, \quad (9)$$

where  $a(\text{pH}, \text{pH}) = a_0$  is the prestimulus (adapted) activity. In our model, the adapted activity for both Tar and Tsr is  $a_0 \equiv k_R/(k_R + k_B)$ . Note that  $S < 0$  and  $S > 0$  correspond

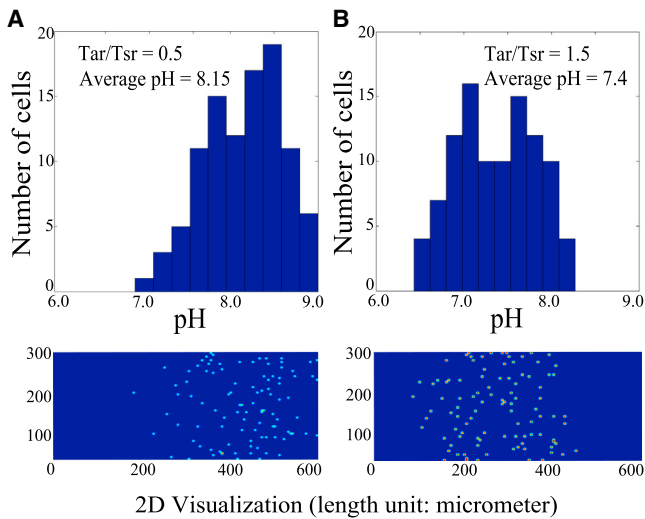

FIGURE 4 Two-dimensional simulations for pH taxis with different Tar/Tsr ratios: (A)  $f_1/f_2 = 0.5$  and (B)  $f_1/f_2 = 1.5$ . (Top panels) Distribution of 100 cells along the linear pH gradient (pH: 6.0  $\rightarrow$  9.0 with  $\Delta \text{pH} = 1$  per 200  $\mu\text{m}$ ). (Bottom panels) Two-dimensional visualizations of those WT cells performing pH taxis in steady state. The Monte Carlo simulation uses those key parameters given in Table 1. The detailed algorithm is provided in the Supporting Material.

to attractant and repellent responses, respectively. For precision sensing,  $S$  needs to reverse sign and thus the inversion point  $\text{pH}^*$  should satisfy

$$S(\text{pH}^*) = 0, \quad (10)$$

which is the first condition required for precision sensing.

By using a mean-field approximation in our model (see the Supporting Material for details) and assuming  $C_{11} = C_{12}$  and  $C_{21} = C_{22}$  for simplicity, we obtain an analytical form for  $S(\text{pH})$  and the above condition (Eq. 10) simplifies to

$$f_1 \times \frac{y_1^A - y_1^I}{(y^* + y_1^A)(y^* + y_1^I)} + f_2 \times \frac{y_2^A - y_2^I}{(y^* + y_2^A)(y^* + y_2^I)} = 0, \quad (11)$$

with redefined variables  $y^* \equiv 10^{\text{pH}^*}$ ,  $y_q^A \equiv 10^{K_q^A}$ , and  $y_q^I \equiv 10^{K_q^I}$  for Tar ( $q = 1$ ) and Tsr ( $q = 2$ ). To satisfy the above equation,  $y_1^A - y_1^I$  should have the opposite sign as  $y_2^A - y_2^I$ , which simply means that Tar and Tsr should have opposite responses to pH. If we further assume that  $y_1^A \approx y_2^A$  (i.e.,  $K_1^A \approx K_2^A$ ),  $y_2^A \gg y_2^I$ ,  $y_1^I \gg y_1^A$ , and  $y_1^I \gg y^* \gg y_2^I$ , then we obtain a simple analytical expression for  $y^* \approx y_2^A \times (f_2/f_1)$ , which leads to the expression for the inversion point ( $\text{pH}^*$ ) as shown in Eq. 8.

Although Eq. 10 is necessary for the existence of an inverted response, it is not sufficient to drive precision sensing. This inversion point  $\text{pH}^*$  needs to be attractive, which is only guaranteed by having

$$S'(\text{pH}^*) \equiv \left. \frac{dS}{d\text{pH}} \right|_{\text{pH}^*} > 0. \quad (12)$$

Equation 12 is the second condition required for precision sensing. For the particular case  $a_0 = 1/2$ , we found that (see the Supporting Material for details)

$$S'(\text{pH}) = \frac{\ln^2(10)}{4} \times \sum_{q=1}^2 f_q \left[ \frac{yy_q^A}{(y + y_q^A)^2} - \frac{yy_q^I}{(y + y_q^I)^2} \right], \quad (13)$$

where  $y \equiv 10^{\text{pH}}$ . For the case  $y_1^I \gg y_1^A \approx y_2^A \gg y_2^I$  considered in this article and in the range  $y_1^I \gg y \gg y_2^I$ , where the inverted response occurs, the above expression can be simplified:

$$S'(\text{pH}) \approx \frac{\ln^2(10)}{4} \times \frac{yy_2^A}{(y + y_2^A)^2} > 0. \quad (14)$$

This shows that the inversion pH level in our model is indeed a stable (attractive) fixed point, which is consistent with the experiments as shown in Fig. 3 C. It is also apparent that  $S'(\text{pH})$  does not depend on Tar/Tsr. Therefore, tuning

the ratio  $f_1/f_2$  can shift the inversion point but does not change the shape of the response curve. This prediction agrees with the experimental data (9) and our simulations (Fig. 3 C): when  $f_1/f_2$  changes from 0.5 to 1.5, the inversion point (as defined by the zero crossing point of the response curves) shifts from 8.0 to 7.5, but the slope of those curves remains roughly the same.

### Possible precision sensing schemes

The two general requirements for precision sensing, as summarized by Eqs. 10 and 12, can be used to evaluate different possible scenarios with two opposing sensors. Fig. 5 illustrates six typical combinations of the two sensors with overlapping sensitivity regimes. To establish a stable inversion point, the push-pull mechanism requires that the repellent sensor (Tar, red line) dominates in the high pH regime, whereas the attractant sensor (Tsr, blue line) must dominate in the low pH regime. This stability requirement immediately rule out the scenarios outlined in Fig. 5, D and E. Fig. 5 F illustrates a special case where the operating regime of Tar is contained in the regime of Tsr. This scheme allows for two fixed points, one attractive and the other repulsive; thus a cell starting at high pH levels may not be able to migrate toward the (preferred) low pH level due to the repulsive fixed point.

The scheme in Fig. 5 A with  $K_2^l < K_1^A \leq K_2^A < K_1^l$  is what we used in this article for pH sensing in *E. coli*. The inversion point is expected to be defined within the overlap-

ped operating regions of Tar and Tsr. This small overlap is necessary because if there is no overlap, e.g.,  $K_2^l < K_1^A < K_2^A < K_1^l$ , cells would show no appreciable response to pH changes within the dead-zone ( $K_2^A, K_1^A$ ), which is inconsistent with experiments (Fig. 3). One advantage of the Fig. 5 A scheme is that it puts no constraints on the relative response strength of Tar and Tsr (which depends on the relative abundance of these receptors). This allows the inversion point to be tunable by freely adjusting the Tar/Tsr ratio as shown in Eq. 8.

The two schemes shown in Fig. 5, B and C, represent the cases where there is a large overlap between the operating ranges of the two opposing sensors. In particular, either the maximums or the minimums of the two operating regimes are close to each other:  $K_2^l \approx K_1^A < K_2^A < K_1^l$  for Fig. 5 B and  $K_2^l < K_1^A < K_2^A \approx K_1^l$  for Fig. 5 C. Let us consider the case in Fig. 5 B. By using Eq. 10 and following the same procedure as before (see the Supporting Material for details), we get an estimate of the inversion pH level,

$$\text{pH}^* \approx K_2^A + \log_{10} \left( \frac{f_2}{f_1} - 1 \right), \quad (15)$$

which means that the existence of the inversion point requires tuning the sensor ratio  $f_1/f_2 < 1$ . For the particular case  $a_0 = 1/2$ , the second condition (Eq. 12) is also satisfied as

$$S'(\text{pH}) \approx f_2 \times \frac{\ln^2(10)}{4} \times \frac{yy_2^A}{(y + y_2^A)^2} > 0, \quad (16)$$

which suggests that  $\text{pH}^*$  is indeed an attractive fixed point if it exists. However, as measured by  $S'(\text{pH})$ , the attraction is now weakened by a factor  $f_2$  in comparison with Eq. 14 for the scenario shown in Fig. 5 A. Intuitively, the broadening of the operating regime of one sensor deep into the operating regime of the opposing sensor weakens the system's precision sensing ability and can even destroy precision sensing if it overpowers the other sensor ( $f_1 > f_2$ ).

Therefore, based on the experimental observation and our aforementioned analysis, the most robust push-pull scheme seems to be the one illustrated in Fig. 5 A. The parameter condition for this scheme can be simply expressed as  $K_2^l < K_1^A \leq K_2^A < K_1^l$ .

### DISCUSSION

A critical challenge for living systems is to find the favorable environment where they can live and prosper. This is usually achieved by continuously sensing the external conditions and performing biased random movements toward those optimal niches. Bacterial chemotaxis serves as an elegant example, because it allows the cells to follow the chemical gradients and navigate unidirectionally toward the highest concentrations of nutrients or lowest levels of toxins. Nonetheless, for many environmental factors such

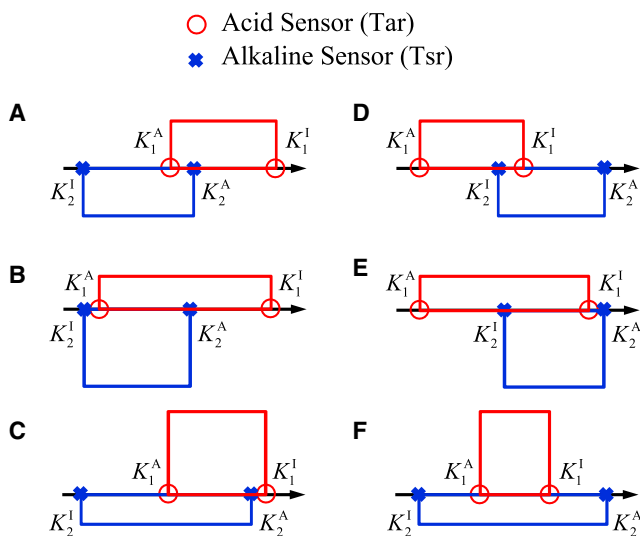

FIGURE 5 Possible schemes for precision sensing. The height of the upper (red) or lower (blue) boxes represents the maximum magnitude of the response of Tar or Tsr, respectively, which depends on the abundance of each type of sensor. The length of the boxes denotes the range of sensitivity as determined by  $K_{1,2}^A$  and  $K_{1,2}^l$ . (Arrow points toward an increasing pH gradient.) Specifically, we consider six typical combinations of the opposing sensory regimes: (A)  $K_2^l < K_1^A \leq K_2^A < K_1^l$ ; (B)  $K_2^l \approx K_1^A < K_2^A < K_1^l$ ; (C)  $K_2^l < K_1^A < K_2^A \approx K_1^l$ ; (D)  $K_1^A < K_2^l \leq K_1^l < K_2^A$ ; (E)  $K_1^A < K_2^l < K_1^l \approx K_2^A$ ; and (F)  $K_2^l < K_1^A < K_1^l < K_2^A$ .

as pH and temperature (5,9,36), the most physiologically favorable conditions do not correspond to the extreme levels of those factors and cells prefer to accumulate around an intermediate level in a gradient. By using a modeling approach, we confirm that this behavior can be achieved by a push-pull mechanism by coordinating two opposing sensors (Tar and Tsr), each dominating in different regimes of pH (Fig. 6).

Bacteria can integrate and respond to a multitude of stimuli. For example, responses of the Tsr receptor to combined repellent/attractant signals has been studied before in the Tar-deletion mutant by the simultaneous photorelease of caged protons and serine (8). Depending on the relative levels of these two effectors, the Tsr receptor was observed to produce an attractant or repellent response. Our computational model can also be extended to predict how bacteria might process the pH signals in the presence of other chemical stimuli (see the Supporting Material for details). As a preliminary step, we hypothesize that the external pH modulates the receptor kinase activity but does not directly affect chemoattractant binding to the receptor. Fig. 7 shows the predicted response of Tar-only mutant to a combination of pH and chemical (MeAsp) stimuli. Because Tar generates an attractant response to [MeAsp] but a repellent response to an increase of pH, the model predicts a neutral response curve (dashed line, Fig. 7 B) along which the effects of increasing pH and adding [MeAsp] cancel out with each other. Experiments similar to that of Khan et al. (8) can be carried out to test our prediction for the Tar-only mutant and to reveal whether the pH sensing step is relatively independent of the chemical binding process in the chemorecep-

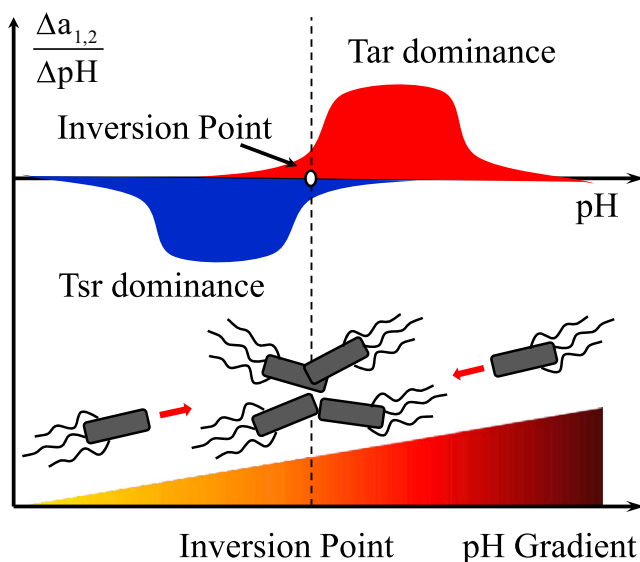

FIGURE 6 Schematic illustration of the push-pull mechanism for bacterial pH taxis. The two opposing sensors, Tar and Tsr, dominate the response in different pH regions. The balance between their competing effects determines the inversion point of the pH response (i.e., the preferred pH value) at which cells appear to accumulate.

tors. The extended model also allows us to study how the presence of chemical attractants affects the pH responses. Our results (see Fig. S1 in the Supporting Material) demonstrate that the pH responses of Tar and Tsr are appreciably weakened when the Tar- and Tsr-only mutants were preadapted to high MeAsp and serine backgrounds, respectively. This is in qualitative agreement with the experimental observations (9).

Bacteria can also perform precision sensing in thero-taxi as they tend to accumulate at  $\sim 37^{\circ}\text{C}$  in a temperature gradient. For *E. coli*, it was found experimentally (38–40) that the Tar receptor can switch from a warm sensor to a cold sensor when the receptor methylation level increases across a critical level. The push-pull mechanism is valid but more subtle in this case as the two balancing effects (push and pull) are provided by the same receptor in different methylation states. The requirements for precision sensing, as summarized by Eqs. 10 and 12 in this article, also apply for thero-taxi. Indeed, based on these general conditions, a theoretical model for thero-taxi by Jiang et al. (41) revealed that imperfect adaptation to temperature changes (in contrast to the perfect adaptation in chemotaxis) is needed to drive the receptor methylation level to cross the critical level where the inverted response occurs.

Despite their similar precision sensing capability, there are some important distinctions between temperature sensing and pH sensing:

1. At least two competing sensors are involved for the push-pull mechanism in pH sensing (Fig. 6), whereas Tar alone is able to invert its sensing mode for temperature.
2. The inversion of pH response requires appropriate combination of the dominant regimes of Tar and Tsr (Fig. 5). Although a high maximum receptor methylation level could lead to a decrease or even inversion of the pH response (especially for Tsr), the experimentally observed change in methylation level due to the pH change alone (9) is not sufficient to drive the receptors to their inversion methylation level in the absence of additional chemoattractants (see the Supporting Material for details). For thero-taxi, however, temperature-induced methylation level change is essential to drive the receptor across the inversion point (41).
3. Although the imperfect adaptation to the temperature is necessary for the inverted response in thero-taxi (41), the push-pull mechanism for pH sensing works with perfect adaptation.

The push-pull mechanism appears to be a general mechanism for precision sensing that enables cells to accumulate at specific intermediate levels of environmental factors. For example, indole, a stationary-phase chemical signal, can also elicit opposite responses via Tar and Tsr. Similar to pH sensing, the response of WT cells to indole gradients gets inverted from the repellent response at low concentrations to attractant response at high concentrations



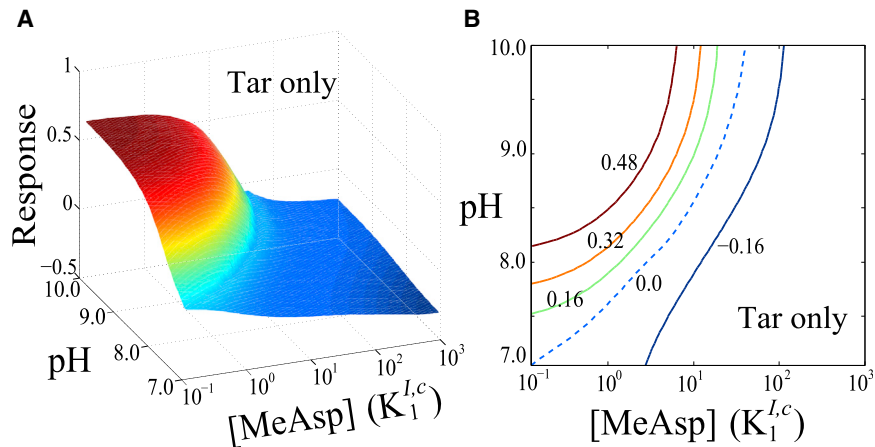

FIGURE 7 Response of the Tar-only mutant to both pH and chemical (MeAsp) stimuli, as predicted by an extended Ising-type model (with details in the Supporting Material). The mutant was preadapted to  $pH_0 = 7.0$  and  $[MeAsp]_0 = 10^{-1} K_1^{I,c}$  before being stimulated to the new state ( $pH, [MeAsp]$ ), where the dissociation constant  $K_1^{I,c} = 18 \mu M$ . (A) Each point in the surface represents the Tar response to a combined stimuli ( $pH, [MeAsp]$ ). (B) The contour plot of panel A on the space ( $pH, [MeAsp]$ ) (dashed line corresponds to the neutral response curve along which the responses to the pH and chemoattractant changes cancel out).

(V. Sourjik, Heidelberg University, personal communication, 2012). Moreover, this inversion is also found to depend on the relative levels of Tar and Tsr. In another example, it was found that two receptors, Tsr and Aer, are responsible for *E. coli* aerotaxis, which leads to the accumulation of bacteria at a preferred level of oxygen (42). This is again similar to the pH taxis and may be explained by a variant of our model. Finally, the four transmembrane chemoreceptors of *E. coli* sense phenol as either an attractant (Tar) or a repellent (Tsr, Tap, and Trg) (43). It would be very interesting to test whether the push-pull mechanism studied here for pH taxis serves as a general strategy in bacterial sensory systems.

## SUPPORTING MATERIAL

Additional analysis, one table, and two figures are available at [http://www.biophysj.org/biophysj/supplemental/S0006-3495\(13\)00524-9](http://www.biophysj.org/biophysj/supplemental/S0006-3495(13)00524-9).

We are grateful to Victor Sourjik and Yiling Yang for providing us with their published experimental data and various details. We thank Ganhui Lan for stimulating discussions.

This research is supported by National Institutes of Health grant No. GM081747 (to Y.T.).

## REFERENCES

- Berg, H. C. 1975. Chemotaxis in bacteria. *Annu. Rev. Biophys. Bioeng.* 4:119–136.
- Adler, J. 1975. Chemotaxis in bacteria. *Annu. Rev. Biochem.* 44:341–356.
- Wadhams, G. H., and J. P. Armitage. 2004. Making sense of it all: bacterial chemotaxis. *Nat. Rev. Mol. Cell Biol.* 5:1024–1037.
- Sourjik, V., and N. S. Wingreen. 2012. Responding to chemical gradients: bacterial chemotaxis. *Curr. Opin. Cell Biol.* 24:262–268.
- Tso, W.-W., and J. Adler. 1974. Negative chemotaxis in *Escherichia coli*. *J. Bacteriol.* 118:560–576.
- Slonczewski, J. L., R. M. MacNab, ..., A. M. Castle. 1982. Effects of pH and repellent tactic stimuli on protein methylation levels in *Escherichia coli*. *J. Bacteriol.* 152:384–399.
- Krikos, A., M. P. Conley, ..., M. I. Simon. 1985. Chimeric chemosensory transducers of *Escherichia coli*. *Proc. Natl. Acad. Sci. USA.* 82:1326–1330.
- Khan, S., J. L. Spudich, ..., D. R. Trentham. 1995. Chemotactic signal integration in bacteria. *Proc. Natl. Acad. Sci. USA.* 92:9757–9761.
- Yang, Y., and V. Sourjik. 2012. Opposite responses by different chemoreceptors set a tunable preference point in *Escherichia coli* pH taxis. *Mol. Microbiol.* 86:1482–1489.
- Grebe, T. W., and J. Stock. 1998. Bacterial chemotaxis: the five sensors of a bacterium. *Curr. Biol.* 8:R154–R157.
- Sourjik, V., and H. C. Berg. 2002. Receptor sensitivity in bacterial chemotaxis. *Proc. Natl. Acad. Sci. USA.* 99:123–127.
- Sourjik, V. 2004. Receptor clustering and signal processing in *E. coli* chemotaxis. *Trends Microbiol.* 12:569–576.
- Lan, G., S. Schulmeister, ..., Y. Tu. 2011. Adapt locally and act globally: strategy to maintain high chemoreceptor sensitivity in complex environments. *Mol. Syst. Biol.* 7:475.
- Bornhorst, J. A., and J. J. Falke. 2000. Attractant regulation of the aspartate receptor-kinase complex: limited cooperative interactions between receptors and effects of the receptor modification state. *Biochemistry.* 39:9486–9493.
- Shi, Y., and T. Duke. 1998. Cooperative model of bacterial sensing. *Phys. Rev. E Stat. Phys. Plasmas Fluids Relat. Interdiscip. Topics.* 58:6399–6406.
- Duke, T. A., and D. Bray. 1999. Heightened sensitivity of a lattice of membrane receptors. *Proc. Natl. Acad. Sci. USA.* 96:10104–10108.
- Bray, D., and T. Duke. 2004. Conformational spread: the propagation of allosteric states in large multiprotein complexes. *Annu. Rev. Biophys. Biomol. Struct.* 33:53–73.
- Mello, B. A., and Y. Tu. 2003. Quantitative modeling of sensitivity in bacterial chemotaxis: the role of coupling among different chemoreceptor species. *Proc. Natl. Acad. Sci. USA.* 100:8223–8228.
- Mello, B. A., L. Shaw, and Y. Tu. 2004. Effects of receptor interaction in bacterial chemotaxis. *Biophys. J.* 87:1578–1595.
- Mello, B. A., and Y. Tu. 2005. An allosteric model for heterogeneous receptor complexes: understanding bacterial chemotaxis responses to multiple stimuli. *Proc. Natl. Acad. Sci. USA.* 102:17354–17359.
- Endres, R. G., and N. S. Wingreen. 2006. Precise adaptation in bacterial chemotaxis through “assistance neighborhoods”. *Proc. Natl. Acad. Sci. USA.* 103:13040–13044.
- Skoge, M. L., R. G. Endres, and N. S. Wingreen. 2006. Receptor-receptor coupling in bacterial chemotaxis: evidence for strongly coupled clusters. *Biophys. J.* 90:4317–4326.

23. Goldman, J. P., M. D. Levin, and D. Bray. 2009. Signal amplification in a lattice of coupled protein kinases. *Mol. Biosyst.* 5:1853–1859.
24. Kim, K. K., H. Yokota, and S.-H. Kim. 1999. Four-helical-bundle structure of the cytoplasmic domain of a serine chemotaxis receptor. *Nature.* 400:787–792.
25. Ames, P., C. A. Studdert, ..., J. S. Parkinson. 2002. Collaborative signaling by mixed chemoreceptor teams in *Escherichia coli*. *Proc. Natl. Acad. Sci. USA.* 99:7060–7065.
26. Studdert, C. A., and J. S. Parkinson. 2005. Insights into the organization and dynamics of bacterial chemoreceptor clusters through in vivo crosslinking studies. *Proc. Natl. Acad. Sci. USA.* 102:15623–15628.
27. Maddock, J. R., and L. Shapiro. 1993. Polar location of the chemoreceptor complex in the *Escherichia coli* cell. *Science.* 259:1717–1723.
28. Kentner, D., S. Thiem, ..., V. Sourjik. 2006. Determinants of chemoreceptor cluster formation in *Escherichia coli*. *Mol. Microbiol.* 61:407–417.
29. Hazelbauer, G. L., J. J. Falke, and J. S. Parkinson. 2008. Bacterial chemoreceptors: high-performance signaling in networked arrays. *Trends Biochem. Sci.* 33:9–19.
30. MacNab, R. M., and D. E. Koshland, Jr. 1972. The gradient-sensing mechanism in bacterial chemotaxis. *Proc. Natl. Acad. Sci. USA.* 69:2509–2512.
31. Vladimirov, N., and V. Sourjik. 2009. Chemotaxis: how bacteria use memory. *Biol. Chem.* 390:1097–1104.
32. Shimizu, T. S., Y. Tu, and H. C. Berg. 2010. A modular gradient-sensing network for chemotaxis in *Escherichia coli* revealed by responses to time-varying stimuli. *Mol. Syst. Biol.* 6:382.
33. Salman, H., and A. Libchaber. 2007. A concentration-dependent switch in the bacterial response to temperature. *Nat. Cell Biol.* 9:1098–1100.
34. Jiang, L., Q. Ouyang, and Y. Tu. 2010. Quantitative modeling of *Escherichia coli* chemotactic motion in environments varying in space and time. *PLOS Comput. Biol.* 6:e1000735.
35. Chen, X., and H. C. Berg. 2000. Solvent-isotope and pH effects on flagellar rotation in *Escherichia coli*. *Biophys. J.* 78:2280–2284.
36. Maeda, K., and Y. Imae. 1979. Thermosensory transduction in *Escherichia coli*: inhibition of the thermoresponse by L-serine. *Proc. Natl. Acad. Sci. USA.* 76:91–95.
37. Reference deleted in proof.
38. Mizuno, T., and Y. Imae. 1984. Conditional inversion of the thermoresponse in *Escherichia coli*. *J. Bacteriol.* 159:360–367.
39. Nishiyama, S.-I., T. Umemura, ..., I. Kawagishi. 1999. Conversion of a bacterial warm sensor to a cold sensor by methylation of a single residue in the presence of an attractant. *Mol. Microbiol.* 32:357–365.
40. Paster, E., and W. S. Ryu. 2008. The thermal impulse response of *Escherichia coli*. *Proc. Natl. Acad. Sci. USA.* 105:5373–5377.
41. Jiang, L., Q. Ouyang, and Y. Tu. 2009. A mechanism for precision-sensing via a gradient-sensing pathway: a model of *Escherichia coli* thermotaxis. *Biophys. J.* 97:74–82.
42. Rebbapragada, A., M. S. Johnson, ..., B. L. Taylor. 1997. The Aer protein and the serine chemoreceptor Tsr independently sense intracellular energy levels and transduce oxygen, redox, and energy signals for *Escherichia coli* behavior. *Proc. Natl. Acad. Sci. USA.* 94:10541–10546.
43. Pham, H. T., and J. S. Parkinson. 2011. Phenol sensing by *Escherichia coli* chemoreceptors: a nonclassical mechanism. *J. Bacteriol.* 193:6597–6604.

## Supporting Information

**Precision sensing by two opposing gradient sensors:  
How does *Escherichia coli* find its preferred pH level?**

Bo Hu and Yuhai Tu

IBM T. J. Watson Research Center  
P.O. Box 218, Yorktown Heights, NY 10598

### Contents

- A Tractable Mean-Field Model for pH Sensing
- 2D Simulation for Bacterial pH Taxis
- An Extended Model Integrating both pH and Chemical Sensing
- A Model Variant with Methylation Level Dependence

## A Tractable Mean-Field Model for pH Sensing

In this supplementary section, we give details about the analytically tractable model for pH sensing. If we just focus on the system-level behaviors of the signaling pathways, the *E. coli* chemosensory machinery can be described by five dynamic variables [1]: the external stimuli  $\text{pH}(t)$  (the input), the average receptor kinase activity  $a_q(t)$  (the output), and the average methylation level of type- $q$  receptors  $m_q(t)$  (the memory), where  $q = 1$  for Tar and  $q = 2$  for Tsr. Again, the separation of timescales argument allows us to apply the quasi-equilibrium approximation to the kinase activity and ligand binding. Therefore, a general coarse-grained model for bacterial pH sensing can be written as:

$$a_1 = G_1(\text{pH}, m_1, a_1, a_2), \quad (\text{S1})$$

$$a_2 = G_2(\text{pH}, m_2, a_1, a_2), \quad (\text{S2})$$

$$\frac{dm_1}{dt} = F_1(a_1, a), \quad (\text{S3})$$

$$\frac{dm_2}{dt} = F_2(a_2, a). \quad (\text{S4})$$

In the above,  $F_{1,2}$  is a transfer function describing the feedback gain of the network depending on both the local activity  $a_{1,2}$  and the global activity  $a$ , whereas the function  $G_{1,2}$  integrates the pH stimuli, the methylation feedback, and the receptor-receptor coupling. Inspired by the Ising-type model described in the main text, we can assume that the receptor activities of Tar and Tsr take the following forms,

$$\frac{1}{a_1} = 1 + \frac{1 + 10^{K_1^I - \text{pH}}}{1 + 10^{K_1^A - \text{pH}}} \cdot \exp \left[ E_{m1} + f_1 C_{11} \left( a_1 - \frac{1}{2} \right) + f_2 C_{12} \left( a_2 - \frac{1}{2} \right) \right], \quad (\text{S5})$$

$$\frac{1}{a_2} = 1 + \frac{1 + 10^{K_2^I - \text{pH}}}{1 + 10^{K_2^A - \text{pH}}} \cdot \exp \left[ E_{m2} + f_2 C_{22} \left( a_2 - \frac{1}{2} \right) + f_1 C_{21} \left( a_1 - \frac{1}{2} \right) \right]. \quad (\text{S6})$$

The above expressions resemble Eq. (5) in the main text and can be viewed as a mean-field approximation of the Ising-type model by using an average methylation level for each type of receptors ( $E_{m,q}$  is a function of  $m_q$  for  $q = 1, 2$ ).

The total receptor-kinase activity is  $a = f_1 a_1 + f_2 a_2$ . For cells that are pre-adapted to a background pH level (denoted by the variable  $\text{pH}$ ), the total activity changes to  $a(\text{pH}, \text{pH}')$  right after the pH level changes to a new level  $\text{pH}'$  (before adaptation sets in). The response at the background to an

infinitesimal increase of pH is characterized by the sensitivity  $S$  defined as:

$$S(\text{pH}) \equiv \lim_{\delta \text{pH} \rightarrow 0} \frac{a(\text{pH}, \text{pH} + \delta \text{pH}) - a(\text{pH}, \text{pH})}{\delta \text{pH}} = \lim_{\delta \text{pH} \rightarrow 0} \frac{\delta a}{\delta \text{pH}}, \quad (\text{S7})$$

where  $a(\text{pH}, \text{pH}) = a_0$  is the pre-stimulus (adapted) activity. For precision sensing,  $S$  needs to reverse sign and thus the inversion point  $\text{pH}^*$  should satisfy:

$$S(\text{pH}^*) = 0, \quad (\text{S8})$$

which is equivalent to

$$\frac{da}{d\text{pH}} = f_1 \frac{da_1}{d\text{pH}} + f_2 \frac{da_2}{d\text{pH}} = 0. \quad (\text{S9})$$

Let  $g_q(\text{pH}) \equiv \ln \left[ (1 + 10^{K_q^I - \text{pH}}) / (1 + 10^{K_q^A - \text{pH}}) \right]$  for  $q = 1, 2$ . Taking derivative on both sides of Eq. (S5) and Eq. (S6) yields

$$-\frac{da_1}{a_1} - \frac{da_1}{1 - a_1} - f_1 C_{11} da_1 - f_2 C_{12} da_2 = g'_1(\text{pH}) d\text{pH}, \quad (\text{S10})$$

$$-\frac{da_2}{a_2} - \frac{da_2}{1 - a_2} - f_2 C_{22} da_2 - f_1 C_{21} da_1 = g'_2(\text{pH}) d\text{pH}, \quad (\text{S11})$$

where  $g'_q(\text{pH})$  is the first derivative of  $g_q(\text{pH})$  for  $q = 1, 2$ . At the inversion point  $\text{pH}^*$ , we should have  $f_1 da_1 + f_2 da_2 = 0$  so that Eqs. (S10) and (S11) can be rewritten as

$$-\frac{da_1}{a_1} - \frac{da_1}{1 - a_1} - f_1 C_{11} da_1 + f_1 C_{12} da_1 = g'_1(\text{pH}^*) d\text{pH}, \quad (\text{S12})$$

$$-\frac{da_2}{a_2} - \frac{da_2}{1 - a_2} - f_2 C_{22} da_2 + f_2 C_{21} da_2 = g'_2(\text{pH}^*) d\text{pH}, \quad (\text{S13})$$

which are equivalent to the following

$$\frac{da_1}{d\text{pH}} = \frac{g'_1(\text{pH}^*)}{f_1(C_{12} - C_{11}) - [a_1(1 - a_1)]^{-1}}, \quad (\text{S14})$$

$$\frac{da_2}{d\text{pH}} = \frac{g'_2(\text{pH}^*)}{f_2(C_{21} - C_{22}) - [a_2(1 - a_2)]^{-1}}. \quad (\text{S15})$$

Plugging the above equations into the condition Eq. (S9) for the inversion pH gives

$$\frac{f_1 g'_1(\text{pH}^*)}{f_1(C_{12} - C_{11}) - [a_1(1 - a_1)]^{-1}} + \frac{f_2 g'_2(\text{pH}^*)}{f_2(C_{21} - C_{22}) - [a_2(1 - a_2)]^{-1}} = 0. \quad (\text{S16})$$

By redefining  $y \equiv 10^{\text{pH}}$ ,  $y_q^A \equiv 10^{K_q^A}$  and  $y_q^I \equiv 10^{K_q^I}$  for  $q = 1, 2$ , we have

$$g'_q(\text{pH}) = \frac{10^{\text{pH}}(10^{K_q^A} - 10^{K_q^I}) \ln(10)}{(10^{\text{pH}} + 10^{K_q^A})(10^{\text{pH}} + 10^{K_q^I})} = \frac{y(y_q^A - y_q^I) \ln(10)}{(y + y_q^A)(y + y_q^I)}, \quad (\text{S17})$$

and Eq. (S16) amounts to

$$\frac{f_1}{f_2} \cdot \frac{f_2(C_{21} - C_{22}) - [a_2(1 - a_2)]^{-1}}{f_1(C_{12} - C_{11}) - [a_1(1 - a_1)]^{-1}} = -\frac{g'_2(\text{pH}^*)}{g'_1(\text{pH}^*)} = \frac{y_2^A - y_2^I}{y_1^I - y_1^A} \cdot \frac{(y^* + y_1^A)(y^* + y_1^I)}{(y^* + y_2^A)(y^* + y_2^I)}. \quad (\text{S18})$$

Note that the above is actually a quadratic equation of  $y^*$ . Thus it is easy to solve  $y^*$  and get the inversion point  $\text{pH}^* = \log_{10}(y^*)$  from Eq. (S18). For simplicity, we assume that  $C_{11} = C_{12}$  and  $C_{21} = C_{22}$  and suppose that both  $a_1$  and  $a_2$  are perfectly adapted to  $a_0 \equiv k_R/(k_R + k_B)$ , as can be guaranteed if we assume perfect adaptation for both Tar and Tsr:  $dm_q/dt = k_R(1 - a_q) - k_B a_q$ . Then, Eq. (S18) is reduced to

$$\frac{f_1}{f_2} = \frac{(y_2^A - y_2^I)(y^* + y_1^A)(y^* + y_1^I)}{(y_1^I - y_1^A)(y^* + y_2^A)(y^* + y_2^I)}. \quad (\text{S19})$$

Let's consider the case that  $y_1^A \approx y_2^A$  (i.e.,  $K_1^A \approx K_2^A$ ),  $y_2^A \gg y_2^I$ ,  $y_1^I \gg y_1^A$ , and  $y_1^I \gg y^* \gg y_2^I$ . In this scenario, Eq. (S19) implies

$$\frac{f_1}{f_2} = \frac{(y_2^A - y_2^I)(y^* + y_1^I)}{(y_1^I - y_1^A)(y^* + y_2^I)} \approx \frac{y_2^A}{y_1^I} \cdot \frac{y_1^I}{y^*} = \frac{y_2^A}{y^*}. \quad (\text{S20})$$

Thus we have  $y^* \approx y_2^A f_2 / f_1$  and the inversion point is

$$\text{pH}^* \approx K_2^A - \log_{10}(f_1/f_2), \quad (\text{S21})$$

which is a decreasing function of the Tar/Tsr ratio  $f_1/f_2$ . Given a change of Tar/Tsr ratio from 0.5 to 1.5, one can estimate that the shift of inversion pH point is roughly:  $\log_{10}(1.5) - \log_{10}(0.5) \approx 0.48$ , which is close to the experimental observation  $8.0 - 7.5 = 0.5$ . Thus, despite the simplicity of this model, it can give a simple quantitative prediction about the dependence of the inversion point on the Tar/Tsr ratio.

Of course, one can relax the assumption of  $C_{11} = C_{12}$  and  $C_{22} = C_{21}$  by allowing that  $C_{21} = C_{22} + \Delta C$  and  $C_{12} = C_{11} + \Delta C$ . Here, we take  $\Delta C \geq 0$  which means that the coupling between homogeneous receptors is at least stronger than the coupling between heterogeneous receptors. We define  $h \equiv (k_R + k_B)^2 / (k_R k_B) = [a_0(1 - a_0)]^{-1}$ . Then Eq. (S18) suggests

$$\frac{f_1}{f_2} \cdot \frac{f_2 \Delta C - h}{f_1 \Delta C - h} \approx \frac{y_2^A}{y^*}, \quad \text{such that} \quad \text{pH}^* \approx K_2^A + \log_{10} \left( \frac{h - f_1 \Delta C}{h - f_2 \Delta C} \right) - \log_{10} \left( \frac{f_1}{f_2} \right). \quad (\text{S22})$$

As tested by various numerical examples, the second term is dominated by the last term in Eq. (S22). This suggests that the coupling between different types of receptors does not affect the inversion point significantly. For this reason, we will assume  $C_{11} = C_{12}$  and  $C_{22} = C_{21}$  for simplicity in the rest of this Supporting Information. Under this condition, Eqs. (S14) and (S15) at the inversion point  $\text{pH}^*$  will reduce to (for  $q = 1, 2$ ):

$$da_q/d\text{pH} = a_q(a_q - 1)g'_q(\text{pH}^*). \quad (\text{S23})$$

As the second condition required for precision sensing, the inversion point  $\text{pH}^*$  needs to be “attractive”, which is ensured only if

$$S'(\text{pH}^*) \equiv \left. \frac{dS}{d\text{pH}} \right|_{\text{pH}^*} > 0. \quad (\text{S24})$$

By Eq. (S23), we can calculate that

$$S'(\text{pH}^*) = \frac{d^2a_q}{d\text{pH}^2} = (2a_q - 1)a_q(a_q - 1)[g'_q(\text{pH}^*)]^2 + a_q(a_q - 1)g''_q(\text{pH}^*). \quad (\text{S25})$$

Suppose that both  $a_1$  and  $a_2$  are perfectly adapted to  $a_0 \equiv k_R/(k_R + k_B)$ . If  $a_0 \leq 1/2$  (which is the case for the wild-type *E. coli*), then the first term in Eq. (S25) is obviously nonnegative. Thus, our main interest is the sign of the second term there. For this reason, we just need to examine the particular case that  $a_0 = 1/2$  (i.e.,  $k_R = k_B$ ) which makes the first term vanish. Direct calculation of  $g''_q(\text{pH})$  yields

$$S'(\text{pH}) = \frac{d^2a_q}{d\text{pH}^2} = \frac{\ln(10)^2}{4} \times \sum_{q=1}^2 f_q y \left[ \frac{y_q^A}{(y + y_q^A)^2} - \frac{y_q^I}{(y + y_q^I)^2} \right]. \quad (\text{S26})$$

For the scheme  $K_2^I < K_1^A \approx K_2^A < K_1^I$  (such that  $y_1^I \gg y_1^A \approx y_2^A \gg y_2^I$  and  $y_1^I \gg y \gg y_2^I$ ) considered in our main text, Eq. (S26) can be simplified:

$$S'(\text{pH}) \approx \frac{\ln^2(10)}{4} \left[ \frac{yy_2^A}{(y + y_2^A)^2} - \frac{f_1 y}{y_1^I} - \frac{f_2 y_2^I}{y} \right] \approx \frac{\ln^2(10)}{4} \times \frac{yy_2^A}{(y + y_2^A)^2} > 0. \quad (\text{S27})$$

The positive sign above indicates that the inversion point is indeed an attractive fixed point.

In the main text, we have considered another scheme for pH sensing:  $K_2^I \approx K_1^A < K_2^A < K_1^I$  (i.e.,  $y_2^I \approx y_1^A \ll y_2^A \ll y_1^I$  and  $y_2^I \approx y_1^A \ll y \ll y_1^I$ ). Then Eq. (S19) reduces to:

$$\frac{f_1}{f_2} = \frac{(y_2^A - y_2^I)(y^* + y_1^I)}{(y_1^I - y_1^A)(y^* + y_2^A)} \approx \frac{y_2^A}{y_1^I} \times \frac{y_1^I}{(y^* + y_2^A)} = \frac{y_2^A}{y^* + y_2^A}, \quad (\text{S28})$$

which leads to

$$y^* \approx (f_2/f_1 - 1)y_2^A \quad \text{or} \quad \text{pH}^* \approx K_2^A + \log_{10}(f_2/f_1 - 1). \quad (\text{S29})$$

The inversion point  $\text{pH}^*$  decreases with the Tar/Tsr ratio  $f_1/f_2$  and exists only if  $f_1 < f_2$ . The second condition Eq. (S24) is also satisfied in this case:

$$\begin{aligned} S'(\text{pH}) &\approx \frac{\ln^2(10)}{4} \left[ \frac{f_2 y y_2^A}{(y + y_2^A)^2} - \frac{f_1 y}{y_1^A} + \frac{(f_1 - f_2) y_1^A}{y} \right] \\ &\approx f_2 \times \frac{\ln^2(10)}{4} \times \frac{y y_2^A}{(y + y_2^A)^2} > 0, \end{aligned} \quad (\text{S30})$$

which is roughly proportional to  $f_2$ , the fraction of Tsr.

## 2D Simulation for Bacterial pH Taxis

In this supplementary section, we provide details about the 2D simulation algorithm for bacterial pH taxis. This model is based on the *Signaling Pathway-based E. coli Chemotaxis Simulator* (SPECS) proposed in Ref. [2]. This simulator allows us to study the chemotaxis behaviors in an environment with spatiotemporal complexity. In this 2D model for pH taxis, the state of Tar or Tsr is represented by its average kinase activity  $a_q(t)$  and average methylation level  $m_q(t)$  at time  $t$  for  $q = 1, 2$ . The external environment is defined by  $\text{pH}(x, t)$  at the physical point  $x$  and time  $t$ . Since we consider a stable gradient here, the pH level only depends on the spatial variable. At each time step, each individual cell will sense its local pH level which leads to the changes of its kinase activities and methylation levels,  $\{a_{1,2}(t), m_{1,2}(t)\}$ . The total kinase activity  $a(t) = f_1 a_1(t) + f_2 a_2(t)$  regulates the switching probability  $P(a(t))$  of the flagellar motor between CCW and CW states. This switching behavior finally leads to the tumble and run motion of the cell. When the cell moves to a new position in the next time step, the algorithm repeats itself as the cell senses a new pH value.

The dynamics of the signaling pathway for pH sensing is governed by the Ising-type model outlined in the main text. We use the same parameter set given in Table 1 for the signaling module which produces the total kinase activity  $a(t)$  over time for each cell and drives its tumble or run motion in space. A phenomenological model is used here to model the bacterial motion. Let  $r = 0, 1$  represent the tumble and run state of the cell. For the time period  $t \rightarrow t + \Delta t$ , a cell switches from state  $r$  to state  $1 - r$  with probability  $P_r([CheYp](t))\Delta t$ , where  $[CheYp](t)$  is assumed to be linearly proportional to the kinase activity  $a(t)$ . According to the measurements by



Cluzel *et al.* [3], the ratio between the two probability rates for one flagellar motor can be described as:

$$\frac{P_1([CheYp])}{P_0([CheYp])} = \frac{[CheYp]^H}{K_{1/2}^H}, \quad (\text{S31})$$

with the Hill coefficient  $H \approx 10$  and the constant  $K_{1/2} \approx 3\mu M$ . We assume that the tumble time is constant  $P_0([CheYp]) = \tau_0^{-1}$  where  $\tau_0 \approx 0.2\text{sec}$  is the average duration of the tumble state. Then, the average run time is  $\tau_1 \approx 0.8\text{sec}$  in steady state, and the probability rate to switch from the run state to the tumble state is given by:

$$P_1([CheYp]) = \tau_0^{-1} \frac{[CheYp]^H}{K_{1/2}^H}. \quad (\text{S32})$$

After a tumbling episode, a new run direction is chosen randomly with the run velocity  $v_0 = 16.5\mu m/\text{sec}$ . A small time step  $\Delta t = 0.1\text{sec}$  is chosen in our simulations to resolve the average tumbling time.

Due to the Brownian fluctuation of the medium, the rotational diffusion of the chemotactic cell can be captured by adding a small Gaussian random angle  $\delta\theta$  to the direction of the velocity in every run time step [2]:  $\theta \rightarrow \theta + \delta\theta$ . The amplitude of this rotational diffusion angle  $\Delta\theta \equiv \sqrt{\langle\delta\theta^2\rangle}$  is estimated to be about 10 degrees. We also implement appropriate boundary condition to ensure the cells swim in the specified region. The following table summarizes other parameters used in our 2D simulator for bacterial pH taxis.

Table S1: **Other parameters used in the 2D Monte Carlo simulation.**

| Parameter                         | Value                   |
|-----------------------------------|-------------------------|
| Total Simulation Time             | 2000 sec                |
| Time Step, $\Delta t$             | 0.1 sec                 |
| Number of Cells                   | 100                     |
| Channel Length                    | 600 $\mu m$             |
| Channel Width                     | 300 $\mu m$             |
| Hill Coeff., $H$                  | 10.3                    |
| Ave. Run Velocity, $v_0$          | 16.5 $\mu m/\text{sec}$ |
| Ave. Run Time, $\tau_1$           | 0.8 sec                 |
| Const. Tumble Time, $\tau_0$      | 0.2 sec                 |
| Ave. Directional Change           | 30 per sec              |
| pH Gradient ( $\Delta\text{pH}$ ) | 1 per 200 $\mu m$       |

# An Extended Model Integrating both pH and Chemical Sensing

In this supplementary section, we describe an extended Ising-type model which integrates both pH and chemical signals. We start by assuming that the external pH signal modulates the receptor-kinase activity primarily by affecting the periplasmic domain, a process independent of the ligand binding to chemoreceptors. Then, each single receptor can be characterized by five state variables  $(q, l_c, l_p, s, m)$  which are labeled as subscripts:  $q$  defines the type of receptor with  $q = 1$  for Tar and  $q = 2$  for Tsr;  $l_c = 0, 1$  denotes the chemical ligand binding state;  $l_p = 0, 1$  indicates the proton “binding” state of the receptor;  $s = 0, 1$  represents the inactive or active conformation of the receptor; and  $m \in [0, 4]$  records the receptor’s methylation level. Thus, the free energy of an individual receptor is given by

$$H_{q,l_c,l_p,s,m} = \mu_q^c \cdot l_c + \mu_q^p \cdot l_p + (E_q^{L,c} \cdot l_c + E_q^{L,p} \cdot l_p + E_{q,m}^M + E_q^C) \cdot s, \quad (\text{S33})$$

where  $\mu_q^c = \ln(K_q^{I,c}/[L]_q)$  and  $\mu_q^c + E_q^{L,c} = \ln(K_q^{A,c}/[L]_q)$  are the chemical potentials of the inactive and active ligand-bound receptors, respectively. Here,  $[L]_q$  is the concentration of ligand that specifically binds to the type- $q$  receptor. We use  $K_1^{I,c} = 18.1\mu\text{M}$ ,  $E_1^{L,c} = 8$  for Tar and  $K_2^{I,c} = 6\mu\text{M}$ ,  $E_2^{L,c} = 3$  for Tsr [4, 5]. Other parameters including  $\mu_q^p$ ,  $E_q^{L,p}$ ,  $E_{q,m}^M$ , and  $E_q^C$  were defined by Eqs. (2-4) in the main text.

For a type- $q$  receptor at methylation state  $m$ , it can be in any of the following  $2^3 = 8$  states in the  $(l_c, l_p, s)$  subspace:  $(0, 0, 0)$ ,  $(0, 1, 0)$ ,  $(1, 0, 0)$ ,  $(1, 1, 0)$ ,  $(0, 0, 1)$ ,  $(0, 1, 1)$ ,  $(1, 0, 1)$ , and  $(1, 1, 1)$ , with the corresponding energies (in the units of the thermal energy  $k_B T$ ) given by:

$$H_{q,0,0,0,m} = 0, \quad (\text{S34})$$

$$H_{q,0,1,0,m} = \mu_q^p, \quad (\text{S35})$$

$$H_{q,1,0,0,m} = \mu_q^c, \quad (\text{S36})$$

$$H_{q,1,1,0,m} = \mu_q^c + \mu_q^p, \quad (\text{S37})$$

$$H_{q,0,0,1,m} = E_{q,m}^M + E_q^C, \quad (\text{S38})$$

$$H_{q,0,1,1,m} = \mu_q^p + E_q^{L,p} + E_{q,m}^M + E_q^C, \quad (\text{S39})$$

$$H_{q,1,0,1,m} = \mu_q^c + E_q^{L,c} + E_{q,m}^M + E_q^C, \quad (\text{S40})$$

$$H_{q,1,1,1,m} = \mu_q^p + \mu_q^c + E_q^{L,p} + E_q^{L,c} + E_{q,m}^M + E_q^C. \quad (\text{S41})$$

Under the quasi-equilibrium approximation, the probability for the receptor to be in each of the 8 states follows the Boltzmann distribution which is proportional to  $\exp(-H_{q,l_c,l_p,s,m})$ . So the average activity of the type- $q$  receptor

at methylation state  $m$  is given by:

$$\langle a \rangle_{q,m} = \frac{e^{-H_{q,0,0,1,m}} + e^{-H_{q,0,1,1,m}} + e^{-H_{q,1,0,1,m}} + e^{-H_{q,1,1,1,m}}}{\sum_{l_c} \sum_{l_p} \sum_s \exp(-H_{q,l_c,l_p,s,m})}. \quad (\text{S42})$$

The extended model is completed by including Eqs. (6) and (7) for the methylation kinetics in the main text. We have presented in the *Discussion* section the simulation result of this model for Tar-only mutant which was pre-adapted to  $\text{pH}_0 = 7.0$  and  $[\text{MeAsp}]_0 = 10^{-1} K_1^{I,c}$  prior to stimulation/changes of both pH and  $[\text{MeAsp}]$ . Since Tar elicits an attractant response to  $[\text{MeAsp}]$  yet a repellent response to an increase of pH, the model predicts a “neutral” response curve along which the effects of changing pH and  $[\text{MeAsp}]$  cancel out with each other. This prediction can be easily tested by experiments and will tell us, for example, whether the proton “binding” process is relatively independent of the (chemical) ligand binding process.

This extended model also allows us to study how the presence of chemical attractants affects the pH responses. In Fig. S1, we plot the pH responses of Tar-only and Tsr-only mutants in the absence (solid lines) or presence (dashed lines) of attractant ( $100\mu\text{M}$  MeAsp for Tar and  $100\mu\text{M}$  serine for Tsr). These mutants were pre-adapted to their respective attractant prior to stimulation of pH changes (increasing pH steps from  $\text{pH}=6.5$  to  $\text{pH}=9.2$  with step size  $\Delta\text{pH}=0.3$ ). Fig. S1 shows the amplitude of the adaptive pH responses right after the stimulation versus the ambient pH prior to each stimulation. One can see that the presence of the ligands (MeAsp and serine) weakens the pH responses of Tar and Tsr, respectively. This is in qualitative agreement with the experimental data [6].

## A Model Variant with Methylation Level Dependence

In the Ising-type model we described in the main text, the dissociation constants  $K_q^{I,A}$  are assumed to be constant for simplicity. In principle, these parameters may depend on the receptor methylation level, i.e.  $K_q^{I,A} = K_q^{I,A}(m)$ , as suggested by pH sensing experiments in Ref. [6]. However, our simulations demonstrate that, regardless of the methylation level dependence, the push-pull mechanism works for pH sensing as long as the opposing sensors (Tar and Tsr) dominate different pH regimes.

In this supplementary section, we discuss model variants considering the methylation level dependence. For example, we can fix  $K_1^I = 9.0$  and  $K_1^A = 7.0$  for Tar, and assume that  $K_2^A = 8.0$  and  $K_2^I(m) = 6.0 + 0.5m$  for Tsr. It

follows that  $\mu_2(m) = \ln(10) \cdot [\text{pH} - K_2^I(m)]$  and  $E_2^I(m) = \ln(10) \cdot [K_2^I(m) - K_2^A]$ , both depending on the Tsr methylation level  $m$ . Fig. S1 shows that this methylation dependence does not change the sign of the Tsr response to pH stimuli (ambient pH: 5.0  $\rightarrow$  9.8). As a result (Fig. S2), this model still contains an inversion pH point around pH 7.0 for the wild-type strain (with  $f_1 = f_2 = 1/2$ ). We have tried other forms of methylation level dependence: for example, fixing  $K_2^A = 8.0$  and  $K_2^I = 6.0$  for Tsr, and assuming that  $K_1^I(m) = 9.0 - 0.5m$  and  $K_1^A = 7.0$  for Tar. Similar to the result in Fig. S2, we found an inversion pH point around pH= 8.0 for the wild-type strain with  $f_1 = f_2 = 1/2$ . As long as the methylation changes do not change the order of  $K_q^I$  and  $K_q^A$ , there could be an inversion pH point in our model. Simulation results for different model variants do not alter our main conclusion that the existence of an inversion pH point requires the opposite responses of Tar and Tsr which should dominate in different pH regimes.

## References

- [1] Tu, Y., T. S. Shimizu, and H. C. Berg. (2008) Modeling the chemotactic response of *Escherichia coli* to time-varying stimuli. *Proc. Natl. Acad. Sci. USA*. 105: 14855-14860.
- [2] Jiang, L., Q. Ouyang, and Y. Tu. (2010) Quantitative modeling of *Escherichia coli* chemotactic motion in environments varying in space and time. *PLoS Comput. Biol.* 6:e1000735.
- [3] Cluzel, P., M. Surette, and S. Leibler. (2000) An ultrasensitive bacterial motor revealed by monitoring signaling proteins in single cells. *Science* 287: 1652-1655.
- [4] Mello, B. A., L. Shaw, and Y. Tu. (2004) Effects of receptor interaction in bacterial chemotaxis. *Biophys. J.* 87:1578-1595.
- [5] Mello, B. A., and Y. Tu. (2005) An allosteric model for heterogeneous receptor complexes: Understanding bacterial chemotaxis response to multiple stimuli. *Proc. Natl. Acad. Sci. USA*. 102:17354-17359.
- [6] Yang, Y., and V. Sourjik. (2012) Opposite responses by different chemoreceptors set a tunable preference point in *Escherichia coli* pH taxis. *Mol. Microbiol.* 86:1482-1489.

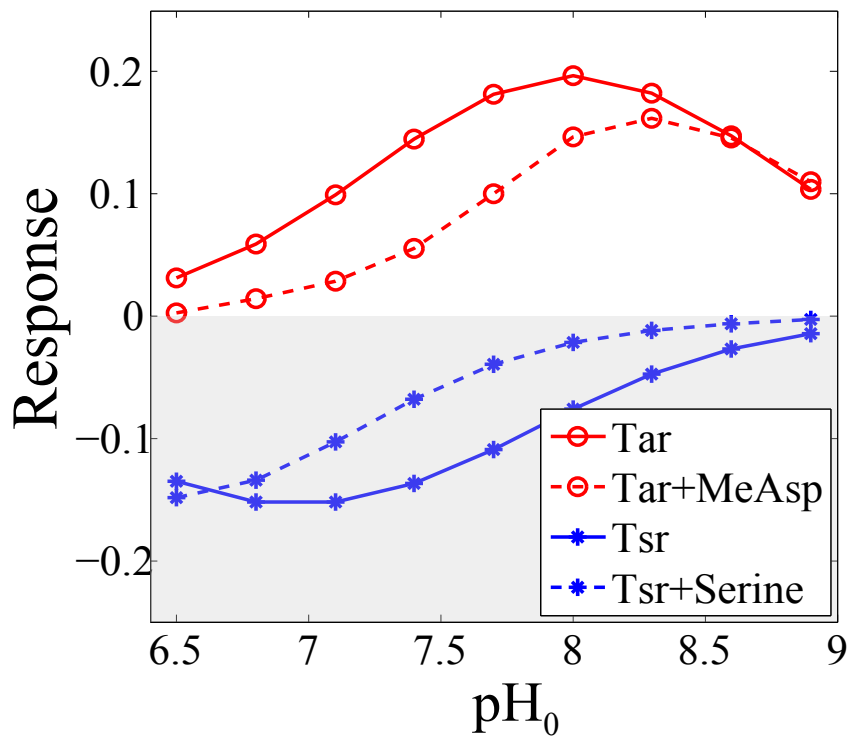

Figure S1: Responses of the Tar-only (red symbols) and Tsr-only (blue symbols) mutants to steps of increasing pH in the absence (solid lines) or presence (dashed lines) of their respective attractant:  $100\mu M$  MeAsp for Tar and  $100\mu M$  serine for Tsr. The ambient  $pH_0$  ranges from 6.5 to 8.9 with the step size  $\Delta pH=0.3$

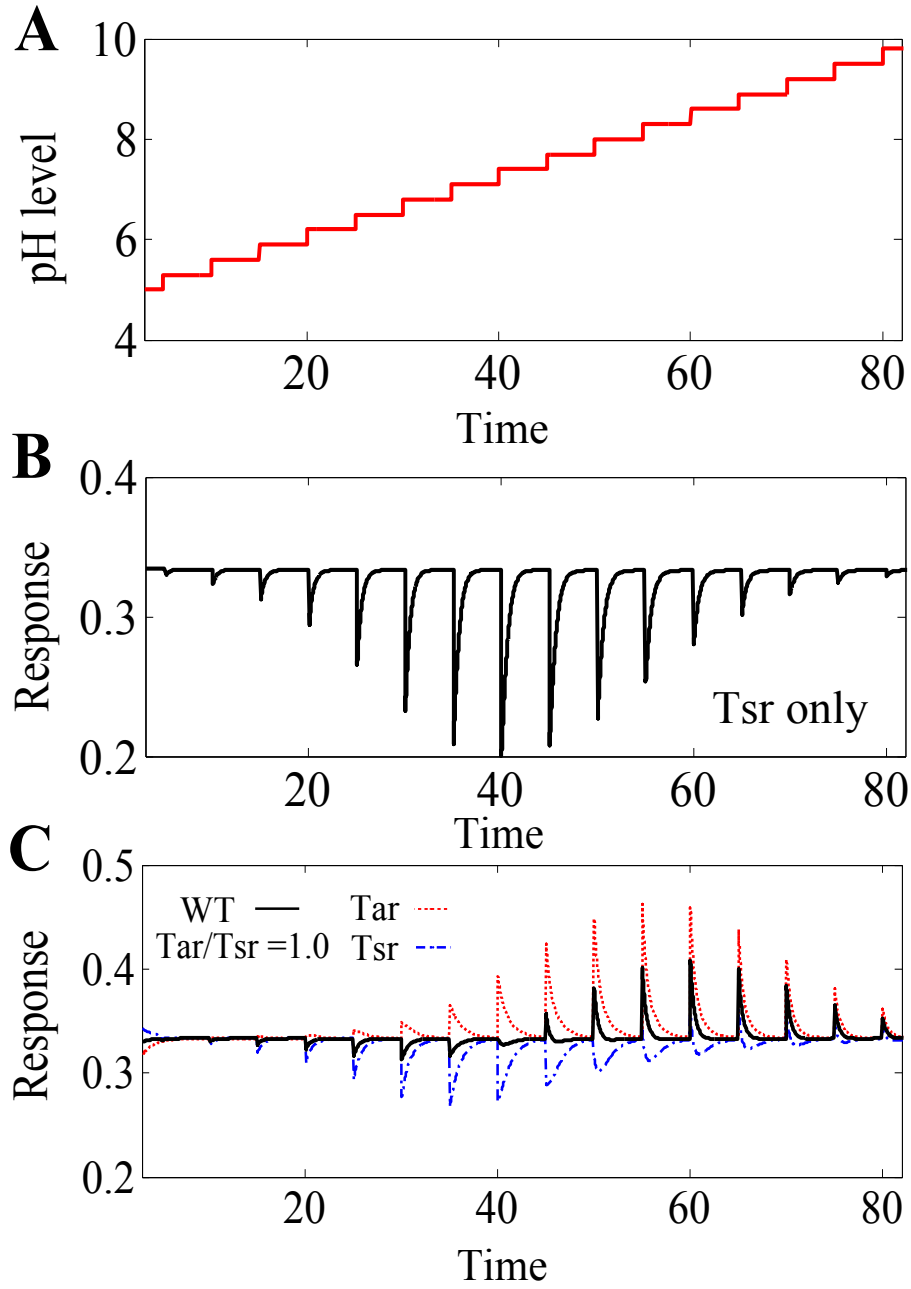

Figure S2: Responses of the Tsr-only mutant and the wild-type strain to steps of increasing pH. In this simulation, we have chosen  $K_2^A = 8.0$  and  $K_2^I(m) = 6.0 + 0.5m$  for Tsr. (A) Steps of increasing pH levels, with ambient  $\text{pH}_0$ :  $5.0 \rightarrow 9.8$  with  $\Delta\text{pH}=0.3$ . (B) Response of the Tsr-only mutant. (C) Response of the wild-type cell (the Tar/Tsr ratio  $f_1 = f_2 = 1/2$ ), together with the average activities contributed by Tar (red dotted line) and Tsr (blue dashed line).
